# Supplementary material for: Mutations in Glucan, Water Dikinase Affect Starch Degradation and Gametophore Development in the Moss Physcomitrella patens
Source: PubMed Central journal article supplement (PMC6805951; doi:10.1038/s41598-019-51632-9), 2019-10-22

**Mutations in Glucan, Water Dikinase Affect Starch Degradation and Gametophore Development in the Moss *Physcomitrella patens*.**

Ntombizanele T. Mdoana, Jonathan F. Jewell, Ethel E. Phiri, Marthinus L. Smith, Kenneth Oberlander, Saire Mahmoodi, Jens Kossmann, James R. Lloyd

**Supplementary Figure 1.** Construct synthesis for mutant production. PCR was used to amplify parts of *PpGWDa* (a) or *PpGWDb* (b) genomic DNA. Arrows indicate approximate primer binding sites within the genes and the H represents the position of the codon encoding the catalytically essential histidine. The amplicons were ligated into pJET1.2/blunt and digested with the restriction sites shown in the gDNA. A resistance cassette containing the cauliflower mosaic virus 35S promoter (*CaMV-35S*), *Klebsiella* hygromycin B phosphotransferase (*hph*) and the cauliflower mosaic virus terminator (*CaMV-ter*) flanked with *loxP* sequences were ligated between those sites.

**Supplementary Figure 2.** Original DNA gels examining expression of *PpGWD1a*, *PpGWD1b* or *PpActin* via semi-quantitative RT-PCR in the wild-type (WT) or mutant lines. NTC denotes no template control and  $\lambda$ PstI is DNA isolated from  $\lambda$  phage digested with PstI and used as a molecular weight marker.

**Supplementary Figure 3.** Growth and gametophore number in the second set of mutant lines. Colonies were established on BCD media, BCD + 0.05M glucose and BCD + 0.05M mannitol and allowed to grow for 5 weeks. Data represents means of at least 3 colonies. Error bars are SEM and, if not visible, are within the symbol.

**Supplementary Figure 4.** Colony morphology of wild-type and second set of mutant lines grown on BCD medium for 1, 2, 3, 4 and 5 weeks.

(a)

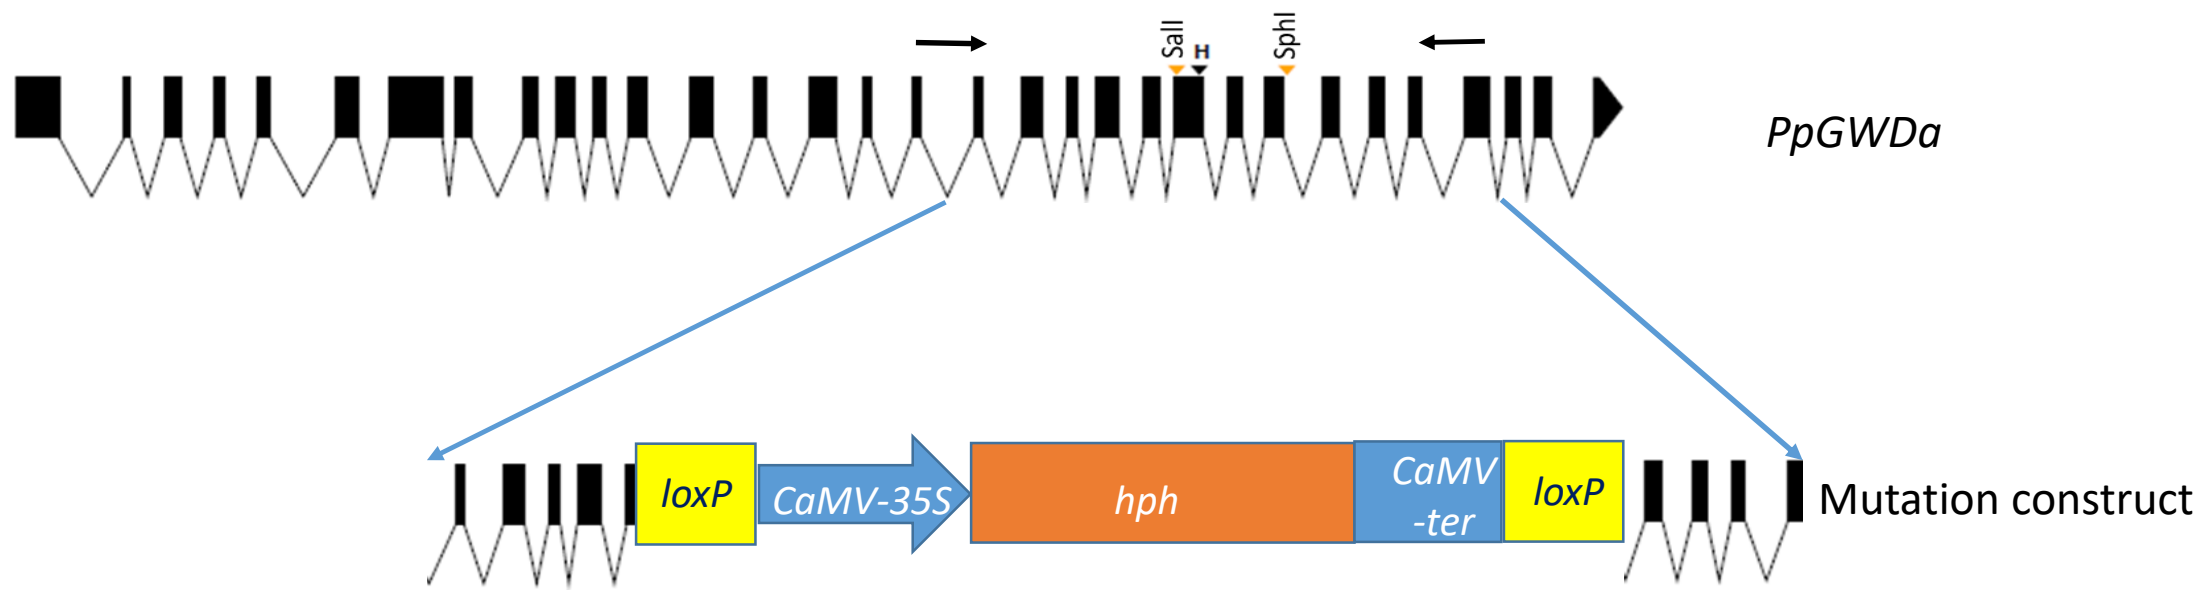

(b)

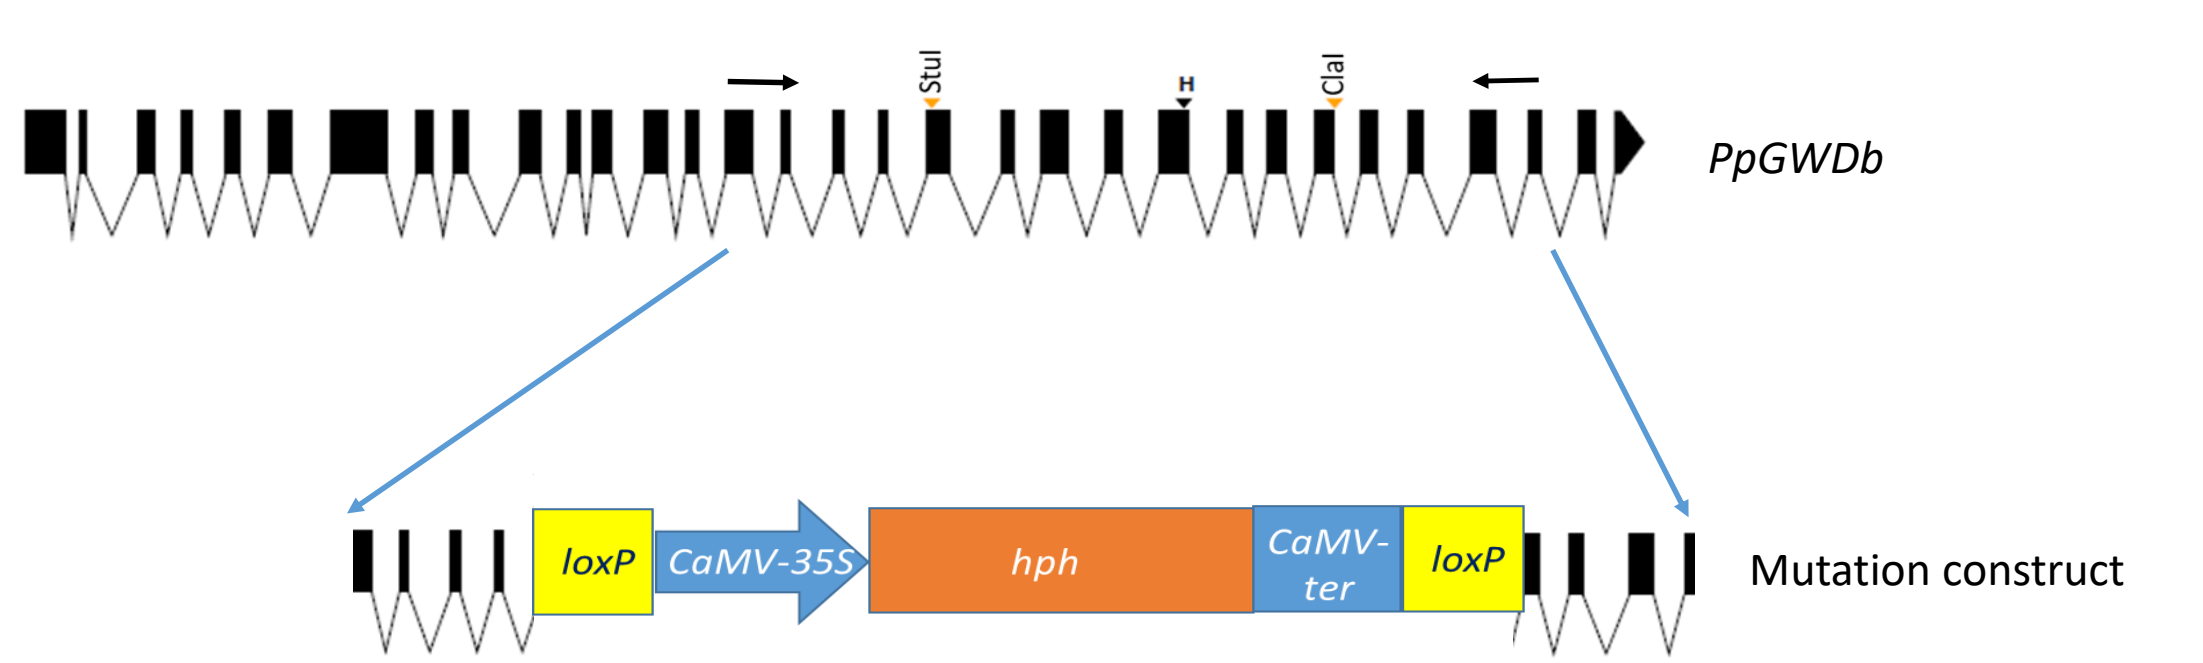

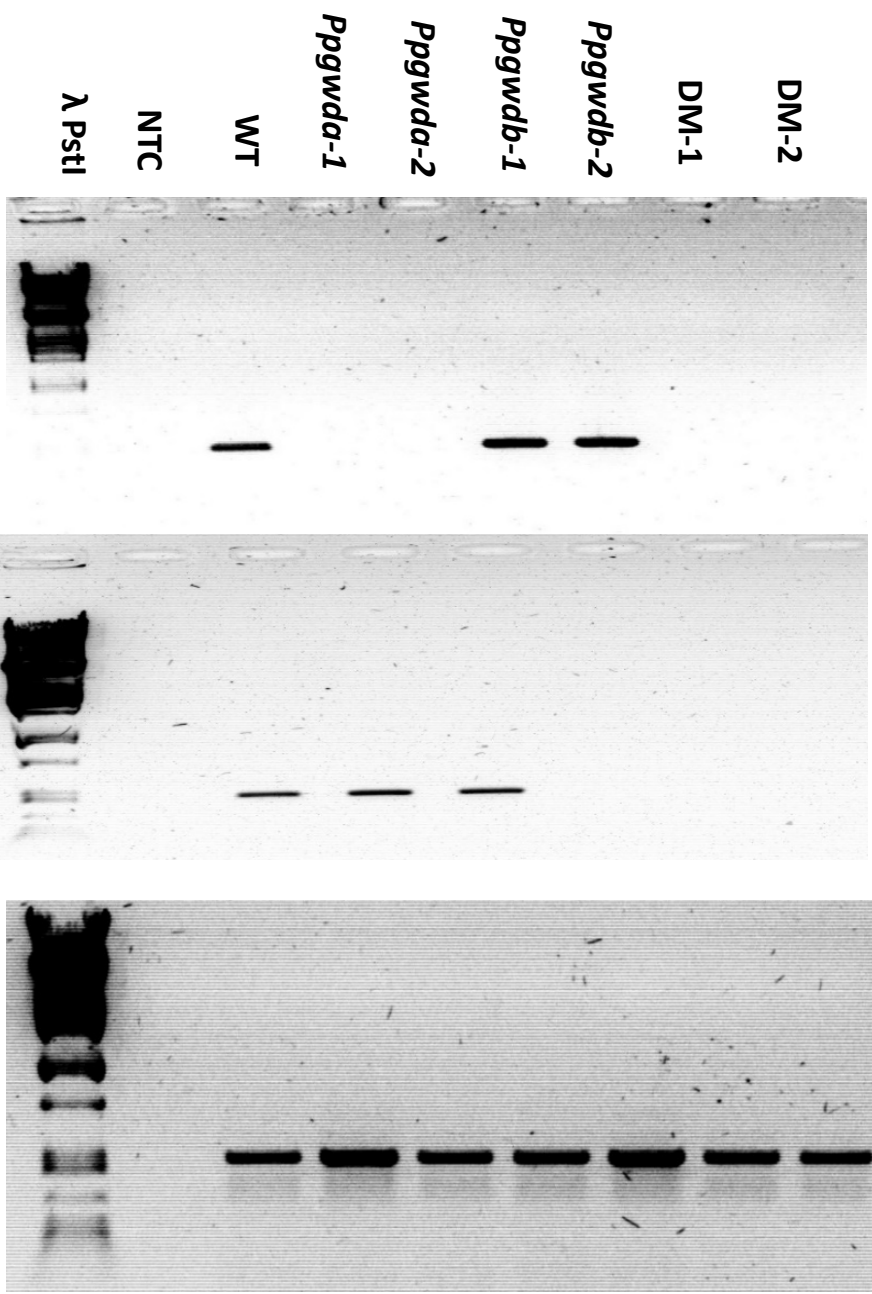

*PpGWDA*

*PpGWDB*

*PpActin*

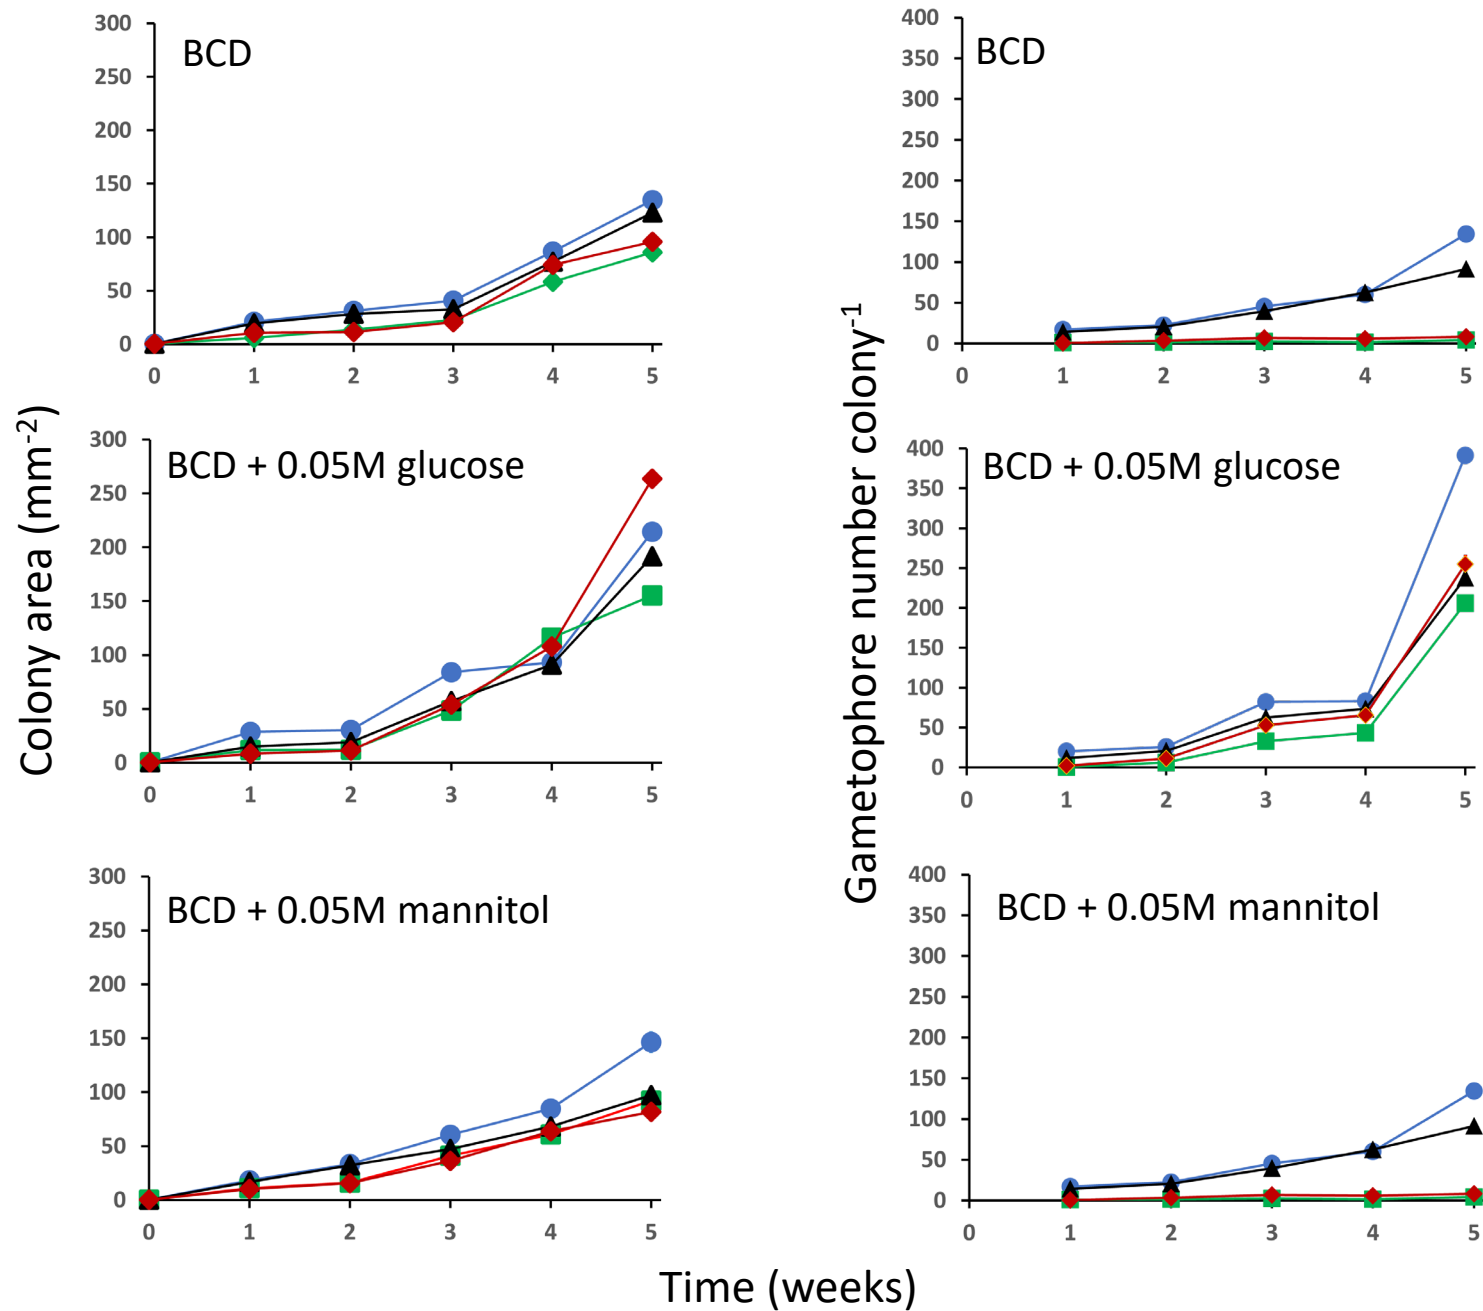

● Wild type   
 ■ *Ppgwda-2*   
 ▲ *Ppgwdb-2*   
 ◆ DM-2

1

2

3

4

5

Wild Type

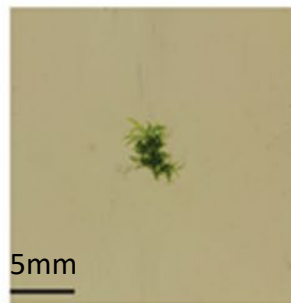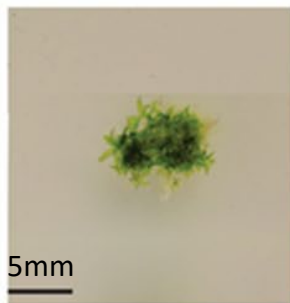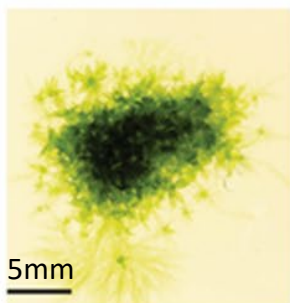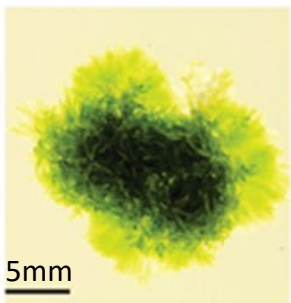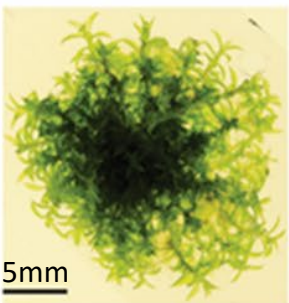*Ppgwda-2*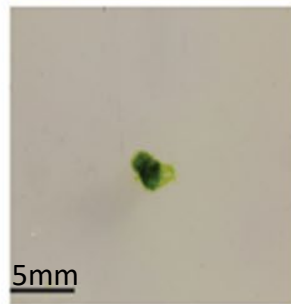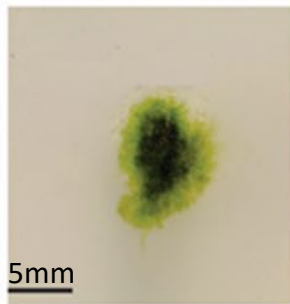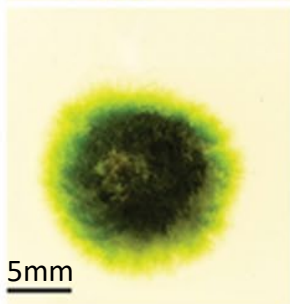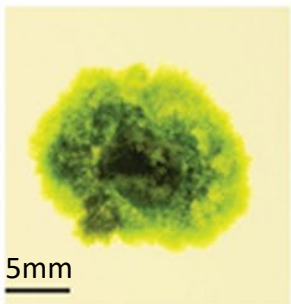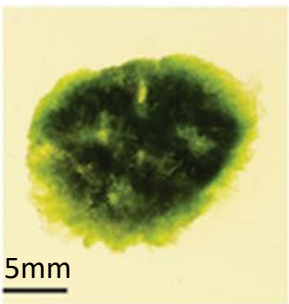*Ppgwdb-2*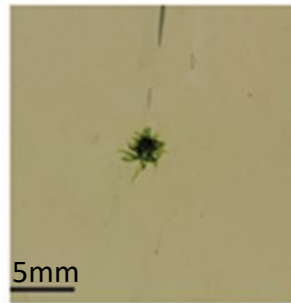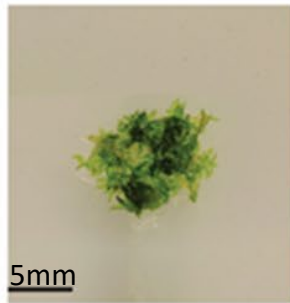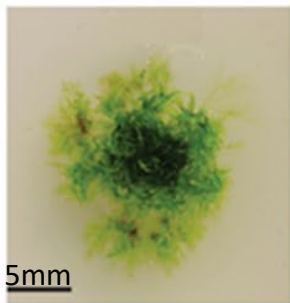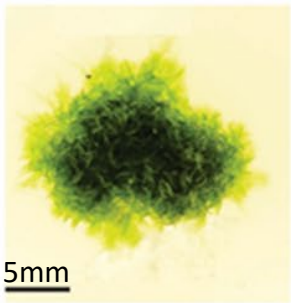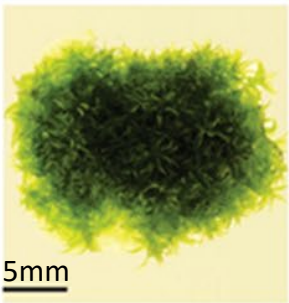

DM-2

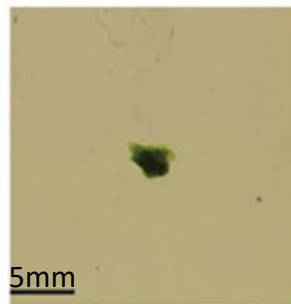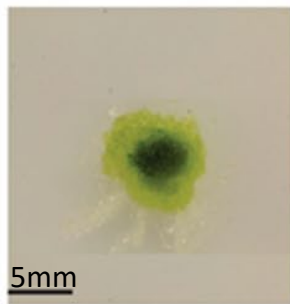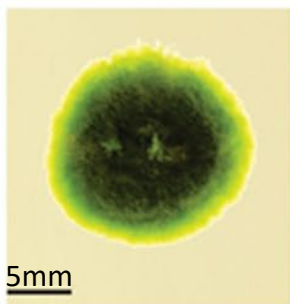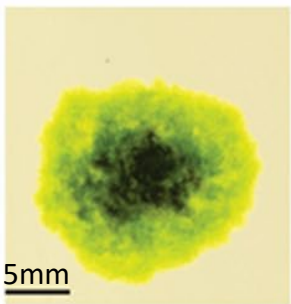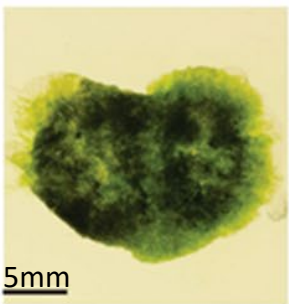

Supplement: 41598_2019_51632_MOESM1_ESM.pdf [file 41598_2019_51632_MOESM1_ESM.pdf]
